# Supplementary material
Source: HighWire-hosted journal article supplement (https://bmjopen.bmj.com/content/12/8/e061722)
Supplement: inline-supplementary-material-3 [file inline-supplementary-material-3.pdf]

**Supplemental file 3: Data extraction instrument**

| Author, year | Country of study | Publication type | Study type | Study duration | Study purpose | Participants | Type of care setting | VR or AR program description | Facilitators | Barriers | Social engagement/loneliness |
|--------------|------------------|------------------|------------|----------------|---------------|--------------|----------------------|------------------------------|--------------|----------|------------------------------|
|--------------|------------------|------------------|------------|----------------|---------------|--------------|----------------------|------------------------------|--------------|----------|------------------------------|
